# Supplementary material for: Can head louse repellents really work? Field studies of piperonal 2% spray
Source: PeerJ. 2014 Apr 17;2:e351. doi: 10.7717/peerj.351 (PMC3994642; doi:10.7717/peerj.351)
Supplement: Supplemental Information 1 [file peerj-02-351-s001.xlsx]

## Sheet: Sheet1
Household allocated	Number	Sex	Age	Hair length	Adults in house	Number of siblings	Had lice at start	Start Group	Start date	Spray bottle A	Spray bottle B	Spray bottle C	Spray bottle D	Spray bottle E		Cross-over	days on 1st treatment	New Group	Completion date	days on 2nd treatment
001	01	F	10	S	2	5	N	3	1994-06-05	June 15.2g	July 20.0g	August 13.6g	weights n/a	weights n/a		N/A	149		1994-11-01
001	02	F	7	S	2	5	N	2	1994-06-05	June 17.6g	July 17.4g	August 12.6g	September 0.1g	Lice found 08/09/94		1994-09-01	88	1	1994-09-08	7
001	03	F	3	L	2	5	N	1	1994-06-05							N/A	149		1994-11-01
029	01	F	6	M	3	4	Y	3	1994-06-19	June 9.8g	July 23.2g	August 10.4g	weights n/a	weights n/a		N/A	133		1994-10-30
029	02	M	5	S	3	4	N	1	1994-06-19							N/A	133		1994-10-30
029	03	F	4	M	3	4	N	2	1994-06-19	June 8.6g	July 17.3g	August 14.4g	weights n/a	weights n/a		N/A	133		1994-10-30
002	01	F	6	L	2	4	N	3	1994-06-19	June 7.4g	July 13.4g	August 10.5g	weights n/a	weights n/a		N/A	133		1994-10-30
002	02	F	5	L	2	4	N	1	1994-06-19	June 1.2g	July 10.4g	Lice found 20/07/94				1994-07-28	39	2	1994-10-30	94
003	01	F	8	M	2	10	N	3	1994-06-06	June 15.6g	WD at end of term as spraying too burdensome					N/A	52		1994-07-28
003	02	F	7	M	2	10	N	2	1994-06-06	June 14.8g	Lice found 21/06/94					1994-06-21	15	1	1994-07-28	37
003	03	F	5	M	2	10	N	2	1994-06-06	not used	WD due to AE 08/06					1994-06-08	2	1	1994-06-21	13
003	04	F	4	M	2	10	N	1	1994-06-06		WD at end of term					N/A	52		1994-07-28
004	01	F	12	L	2	5	N	2	1994-06-05	June 28.6g	July 26.7g	not used	Lice found 20/08/94			1994-08-24	80	1	1994-09-04	11
004	02	F	11	L	2	5	Y	3	1994-06-05	June 32.5g	Lice found 26/06/94					1994-06-26	21	1	1994-08-24	59
004	03	F	5	M	2	5	N	1	1994-06-05				Lice found 20/08/94			1994-08-24	80	2	1994-11-03	71
030	01	F	13	L	2	4	Y	3	1994-05-29	June 8.2g	July 47.4g	Lice found 14/07/94				1994-07-14	46	1	1994-07-28	14
030	02	F	7	L	2	4	Y	2	1994-05-29	June 6.8g	July 44.1g	Lice found 11/07/94				1994-07-11	43	1	1994-07-28	17
037	01	M	14	S	2	4	Y	1	1994-05-29							N/A	60		1994-07-28
037	02	M	10	S	2	4	Y	1	1994-05-29			Lice found 24/07/94				1994-07-24	56		1994-07-28
043	01	F	6	S	2	5	N	3	1994-06-14	June 13.3g	July 24.9g	August 16.5g	weights n/a	weights n/a		N/A	138		1994-10-30
043	02	F	6	S	2	5	N	2	1994-06-14	June 12.5g	July 24.8g	August 23.1g	weights n/a	weights n/a		N/A	138		1994-10-30
043	03	F	4	S	2	5	N	1	1994-06-14							N/A	138		1994-10-30
005	01	M	5	S	3	9	N	3	1994-06-19	June1.5g	WD					N/A	39		1994-07-28
005	02	F	9	M	3	9	N	2	1994-06-19	June 4.2g	WD					N/A	39		1994-07-28
005	03	M	8	S	3	9	N	3	1994-06-19	not used	WD					N/A	39		1994-07-28
005	04	M	12	S	3	9	N	2	1994-06-19	June 0.6g	WD					1994-06-27	8		1994-06-27
005	05	F	6	M	3	9	N	1	1994-06-19		WD					1994-06-27	8		1994-06-27
005	06	F	11	M	3	9	N	1	1994-06-19		WD					N/A	39		1994-07-28
054	01	F	8	L	2	6	Y	3	1994-07-11	July 28.2g	lost	lost	October 27.9g			N/A	111		1994-10-30
054	02	F	7	L	2	6	N	3	1994-07-11	July 29.0g	lost	lost	October 31.0g			N/A	111		1994-10-30
006	01	M	7	S	2	7	N	1	1994-05-29			WD				N/A	77		1994-08-14
006	02	F	8	M	2	7	N	2	1994-05-29	June 5.2g	July 12.9g	Lice found 27/07 so WD				1994-07-27	59		1994-07-27
006	03	F	5	M	2	7	N	1	1994-05-29			WD				1994-07-27	59		1994-07-27
006	04	M	10	S	2	7	N	2	1994-05-29	June 2.2g	July 7.1g	WD				N/A	77		1994-08-14
006	05	M	11	S	2	7	N	3	1994-05-29	June 2.9g	July 3.1g	WD				N/A	77		1994-08-14
007	01	F	9	L	4	9	N	3	1994-06-15	June 22.2g	July 3.5g	Lice found 20/07/94				1994-06-20	4	1	1994-09-22	73
007	02	F	13	L	4	9	Y	2	1994-06-15	June 16.2g	July 7.3g	Lice found 11/07/94				1994-07-11	26	1	1994-09-22	73
031	01	M	6	S	2	4	N	3	1994-06-05	June 21.2g	July 23.8g	August 18.2g	weights n/a	weights n/a		N/A	149		1994-11-01
031	02	F	5	L	2	4	N	2	1994-06-05	June 2.5g	Lice found 06/06					1994-06-06	1	1	1994-11-01	148
008	01	F	6	L	2	9	Y	3	1994-06-12	June 7.1g	Lice found 26/06/94					1994-06-26	14	1	1994-08-24	59
008	02	M	8	S	2	9	N	3	1994-06-12	June 3.9g	lost	not used	weights n/a	weights n/a		N/A	140		1994-10-30
008	03	M	11	S	2	9	N	2	1994-06-12	June 6.9g	lost	not used	Lice found 24/08/94			1994-08-24	73		1994-10-30
008	04	F	4	M	2	9	Y	2	1994-06-12	June 2.6g	lost	not used	Lice found 24/08/94			1994-08-24	73		1994-09-30
033	01	M	10	S	2	9	N	1	1994-06-12				Lice found 24/08/94			1994-08-24	73		1994-09-24
009	01	F	9	L	4	7	N	3	1994-06-15	June 35.8g	July 10.1g	August 6.4g	weights n/a	weights n/a		N/A	137		1994-10-30
044	01	F	8	M	5	7	N	1	1994-06-05	Lice found 27/06/94						1994-06-27	22		1994-06-27
044	02	F	7	M	5	7	N	1	1994-06-05							N/A	147		1994-10-30
010	01	F	3	M	2	5	N	1	1994-06-05							N/A	147		1994-10-30
010	02	F		M	2	5	N	2	1994-06-05	WD from treatment 05/06/94						1994-06-05	0	1	1994-10-30	147
010	03	F		M	2	5	N	3	1994-06-05	WD from treatment 05/06/94						1994-06-05	0	1	1994-10-30	147
011	01	M	6	S	2	6	N	1	1994-05-29							N/A	156		1994-11-01
011	02	F	8	M	2	6	N	2	1994-05-29	May 8.1g	June 20.2g	lost	August 11.9g	Lice found 25/08/94		1994-08-26	89	1	1994-11-01	67
011	03	F	11	M	2	6	N	1	1994-05-29			Lice found 11/07/94				1994-07-11	43		1994-07-11
011	04	M	8	S	2	6	N	3	1994-05-29	May 5.5g	June 15.0g	Lice found 05/07/94				1994-07-06	38	1	1994-11-01	118
011	05	M	4	S	2	6	N	2	1994-05-29	May 4.8g	June 12.2g	July 15.6g	August 19.3g	weights n/a		N/A	156		1994-11-01
039	01	F	5	L	2	6	N	1	1994-06-09			Lice found 12/08/94				1994-08-12	64		1994-08-12
012	01	F	6	M	2	2	Y	1	1994-06-14	Lice found 26/06/94						1994-07-01	17	2	1994-11-01	123
012	02	F	9	M	2	2	Y	2	1994-06-14	June 12.8g	July 11.9g	August 7.4g	weights n/a	weights n/a		N/A	140		1994-11-01
027	01	M	5	S	4	8	N	3	1994-06-12	June 12.8g	July 17.3g	August 25.1g	weights n/a	weights n/a		N/A	140		1994-10-30
027	02	F	7	M	4	8	Y	2	1994-06-12	June 17.5g	Lice found 30/06/94					1994-06-30	18	1	1994-10-04	96
013	01	M	14	S	3	10	N	3	1994-06-07	June 0.2g	DO 07/06/94						0		1994-06-07
013	02	F	10	M	3	10	N	1	1994-06-07				Lice found 01/09/94			1994-09-01	86	2	1994-11-03	63
013	03	F	8	M	3	10	N	3	1994-06-07	June 11.9g	July 5.0g	August 2.0g	weights n/a	weights n/a		N/A	149		1994-11-03
013	04	F	6	M	3	10	N	1	1994-06-07					Lice found 24/10/94		1994-10-24	139	2	1994-11-03	10
014	01	F	7	M	2	6	N	3	1994-06-12	June 4.2g	July 3.5g	not used	weights n/a	weights n/a		N/A	140		1994-10-30
014	02	M	10	S	2	6	N	2	1994-06-12	June 0.9g	Lice found 24/06/94					N/A	15		1994-06-27
014	03	F	5	S	2	6	Y	1	1994-06-12							1994-06-24	12		1994-06-24
014	04	F	9	L	2	6	N	3	1994-06-12	June 4.3g	July 1.8g	August 2.5g	weights n/a	weights n/a		N/A	140		1994-10-30
046	01	F	10	M	2	2	N	3	1994-06-15	June 7.0g	not used	not used	not used	Lice found 03/10/94		1994-10-03	110		1994-11-01
046	02	M	9	S	2	2	N	1	1994-06-15							N/A	139		1994-11-01
057	01	F	9	M	2	?	N	3	1994-08-16	June 7.2g	not used	not used	Lice found 01/09/94			1994-09-01	16	1	1994-10-02	31
047	01	M	11	S	3	7	N	3	1994-06-12	June 13.4g	lost	August 18.8g	Lice found 13/08/94	weights n/a		1994-08-13	62		1994-08-13
047	02	M	5	S	3	7	N	2	1994-06-12	11.9g	16.2g	1.6g	weights n/a	weights n/a		N/A	140		1994-10-30
050	01	M	13	S	3	7	N	1	1994-06-12			Lice found 22/08/94				N/A	71		1994-08-22
050	02	F	8	M	3	7	N	1	1994-06-12			Lice found 22/08/94				N/A	71		1994-08-22
015	01	F	14	M	5	12	N	1	1994-05-29			WD 08/08/94				N/A	71		1994-08-08
015	02	F	4	M	5	12	N	1	1994-05-29							N/A	154		1994-10-30
015	03	F	6	M	5	12	N	3	1994-05-29	May 6.1g	June 17.7g	Lice found 23/06/94				1994-06-23	25	1	1994-10-30	129
015	04	F	11	M	5	12	N	2	1994-05-29	May 5.7g	June 34.5g	July 7.1g	August 0.1g	weights n/a		1994-10-04	128	1	1994-10-30	26
015	05	F	9	M	5	12	N	3	1994-05-29	May 6.0g	June 18.4g	Lice found 23/06/94				1994-06-23	25	1	1994-10-30	129
028	01	F	15	M	2	3	N	1	1994-06-06			DO 28/08/94				N/A	83		1994-08-28
052	01	F	13	M	4	7	N	3	1994-06-12	June 14.3g	July 0.1g	August 22.8g	weights n/a	weights n/a		1994-10-30	140		1994-10-30
052	02	F	10	L	4	7	Y	2	1994-06-12	June 20.5g	July 3.2g	Lice found 11/07/94				1994-07-11	29	1	1994-10-30	111
052	03	F	8	L	4	7	N	3	1994-06-12	June 13.3g	lost	lost	Lice found 22/08/94			1994-08-22	71	1	1994-10-30	69
049	01	M	14	S	2	6	N	2	1994-06-14	June 8.9g	July 9.9g	August 0.1g	weights n/a	weights n/a		N/A	140		1994-11-01
049	02	F	10	L	2	6	N	3	1994-06-14	June 7.8g	Lice found 30/06/94					1994-07-01	17	1	1994-09-01	62
049	03	M	7	S	2	6	N	3	1994-06-14	June 13.3g	July 9.2g	August 6.1g	weights n/a	weights n/a		N/A	140		1994-11-01
049	04	M	4	S	2	6	N	1	1994-06-14							N/A	140		1994-11-01
051	01	F	11	L	2	6	N	1	1994-06-14		Lice found 07/07/94					1994-07-07	23		1994-07-07
016	01	F	5	M	2	8	N	3	1994-05-29	May 6.2g	June 29.9g	July 12.1g	weights n/a	weights n/a		N/A	154		1994-10-30
016	02	F	12	L	2	8	N	3	1994-05-29	May 13.8g	June 23.1g	Lice found 07/06/94				1994-06-07	9	1	1994-06-27	20
016	03	F	9	M	2	8	N	2	1994-05-29	May 8.4g	June 30.8g	July 10.0g	weights n/a	weights n/a		N/A	154		1994-10-30
016	04	F	7	M	2	8	N	1	1994-05-29				Lice found 03/08/94			1994-08-04	67	3	1994-10-30	87
017	01	F	10	M	3	9	Y	2	1994-06-05	June 26.6g	July 13.4g	August 7.3g	Lice found 01/09/94			1994-09-01	88	1	1994-09-22	21
017	02	F	9	S	3	9	N	3	1994-06-05	June 25.6g	July 12.9g	August 5.4g	Lice found 20/08/94			1994-09-01	88	1	1994-10-04	33
017	03	M	4	S	3	9	N	1	1994-06-05		Lice found 22/07/94					1994-07-22	47		1994-07-22
017	04	F	14	M	3	9	N	2	1994-06-05	June 27.9g	July 11.7g	August 8.7g	weights n/a	Lice found 29/09/94		1994-09-29	116	1	1994-11-03	35
017	05	F	7	M	3	9	Y	1	1994-06-05					Lice found 01/09/94		1994-09-01	88	3	1994-09-22	21
018	01	F	11	L	2	6	N	1	1994-06-07							N/A	157		1994-11-11
018	02	M	12	S	2	6	N	2	1994-06-07	June 11.7g	July 16.4g	weights n/a	weights n/a	weights n/a		N/A	157		1994-11-11
018	03	F	14	M	2	6	N	3	1994-06-07	June 20.2g	July 18.1g	weights n/a	weights n/a	weights n/a		N/A	157		1994-11-11
036	01	M	6	S	2	6	N	1	1994-06-07							N/A	157		1994-11-11
019	01	F	12	M	2	6	N	3	1994-06-06	June 19.4g	July 12.1g	August 9.6g	weights n/a	weights n/a		N/A	146		1994-10-30
019	02	F	7	S	2	6	N	2	1994-06-06	June 20.4g	July 16.5g	August 13.6g	weights n/a	weights n/a		N/A	146		1994-10-30
019	03	F	9	M	2	6	N	3	1994-06-06	June 11.6g	Lice found16/06/94					1994-06-17	11	1	1994-10-30	135
019	04	M	4	S	2	6	N	1	1994-06-06					Lice found 13/10/94		1994-10-13	129		1994-10-13
034	01	F	9	M	2	7	N	1	1994-06-05				Lice found 14/09/94			1994-09-14	101		1994-10-30
034	02	F	7	M	2	7	N	1	1994-06-05	Lice found 24/06/94						1994-06-24	19		1994-06-26
034	03	F	11	L	2	7	N	1	1994-06-05					Lice found 16/10/94		1994-10-16	133		1994-10-16
034	04	M	5	S	2	7	N	1	1994-06-05							N/A	147		1994-10-30
034	05	F	13	M	2	7	N	1	1994-06-05							N/A	147		1994-10-30
020	01	M	6	S	2	9	N	2	1994-06-05	June 24.5g	Lice found 26/06/94					1994-06-26	21	1	1994-07-15	19
020	02	F	13	M	2	9	Y	2	1994-06-05	June 14.8g	July 7.8g	Lice found 10/07/94	WD 15/07/94			1994-07-10	35	1	1994-07-15	5
020	03	F	10	M	2	9	N	1	1994-06-05		Lice found 26/06/94		WD 11/07/94			1994-06-26	21	3	1994-07-11	15
020	04	F	8	M	2	9	N	3	1994-06-05	June 32.3g	Lice found 26/06/94		WD 15/07/94			1994-06-26	21	1	1994-07-15	15
020	05	F	12	M	2	9	N	2	1994-06-05	June 29.4g	July 10.1g		WD 15/07/94			N/A	40		1994-07-15
020	06	M	5	S	2	9	Y	2	1994-06-05	June 26.0g	lost		WD 15/07/94			N/A	40		1994-07-15
020	07	F	14	M	2	9	Y	3	1994-06-05	June 40.9g	Lice found 26/06/94		WD 15/07/94			1994-06-26	21	1	1994-07-15	19
053	01	M	14	S	2	3	N	2	1994-06-19	June 22.7g	weights n/a	August 16.0g	September 18.0g	weights n/a		N/A	133		1994-10-30
053	02	F	10	L	2	3	N	3	1994-06-19	June 23.2g	weights n/a	August 29.4g	September 13.5g	weights n/a		N/A	133		1994-10-30
053	03	M		S	2	3	N	3	1994-06-19	June 30.8g	weights n/a	August 17.9g	September 10.2g	weights n/a		N/A	133		1994-10-30
045	01	F	8	M	3	5	N	3	1994-06-14	June 13.7g	July 7.7g	August 5.0g	weights n/a	weights n/a		N/A	140		1994-11-01
021	01	F	5	M	2	7	N	2	1994-06-12	June 20.1g	July 43.9g	August 7.8g	weights n/a	weights n/a		N/A	140		1994-10-30
035	01	F	10	M	2	7	N	1	1994-06-12							N/A	140		1994-10-30
035	02	F	7	M	2	7	Y	1	1994-06-12							N/A	140		1994-10-30
022	01	F	11	L	4	11	N	1	1994-06-05			WD 28/08/94				N/A	53		1994-07-28
022	02	F	7	M	4	11	N	3	1994-06-05	June 10.0g	July 0.1g	WD 28/08/94				N/A	53		1994-07-28
022	03	F	5	M	4	11	N	2	1994-06-05	June 7.4g	Lice found 10/06/94	WD 28/08/94				1994-06-10	5	1	1994-07-28	48
023	01	F	8	L	2	6	N	3	1994-06-05	June 14.8g	July 9.8g	lost	September 36.3g	weights n/a		N/A	151		1994-11-03
023	02	M	10	S	2	6	N	2	1994-06-05	June 11.1g	July 7.9g	August 25.6g	weights n/a	weights n/a		N/A	151		1994-11-03
023	03	M	5	S	2	6	N	2	1994-06-05	June 10.6g	July 9.9g	August 22.6g	weights n/a	weights n/a		N/A	159		1994-11-11
023	04	M	11	S	2	6	N	3	1994-06-05	June 10.7g	July 7.0g	lost	September 24.8g	weights n/a		N/A	159		1994-11-11
032	03	F	7	M	3	7	Y	2	1994-06-06	June 18.7g	weights n/a	weights n/a	weights n/a	weights n/a		N/A	146		1994-10-30
038	01	F	8	L	3	7	N	1	1994-06-06							N/A	146		1994-10-30
038	02	M	7	S	3	7	N	1	1994-06-06							N/A	146		1994-10-30
040	01	F	3	M	2	4	N	1	1994-06-19							N/A	133		1994-10-30
040	02	M	8	S	2	4	N	1	1994-06-19							N/A	133		1994-10-30
040	03	F	6	M	2	4	N	1	1994-06-19					Lice found 01/10/94		1994-10-01	104	3	1994-10-30	29
024	01	M	7	S	2	6	N	3	1994-06-05	June 26.8g	weights n/a	weights n/a	weights n/a	weights n/a		N/A	159		1994-11-11
024	02	M		S	2	6	N	1	1994-06-05							N/A	159		1994-11-11
024	03	M	9	S	2	6	N	2	1994-06-05	June 31.0g	weights n/a	weights n/a	weights n/a	weights n/a		N/A	159		1994-11-11
024	04	F	12	L	2	6	N	1	1994-06-05							N/A	159		1994-11-11
024	05	F	10	M	2	6	N	2	1994-06-05	June 26.0g	weights n/a	weights n/a	weights n/a	weights n/a		N/A	159		1994-11-11
048	01	F	9	L	2	6	N	1	1994-06-12		Lice found 13/06/94					1994-06-13	1	2	1994-07-28	45
048	02	M	8	S	2	6	Y	3	1994-06-12	June 24.5g	July 20.1g	August 12.2g	weights n/a	weights n/a		N/A	152		1994-11-11
048	03	M	6	S	2	6	N	3	1994-06-12	June 15.9g	July 20.1g	August 11.6g	weights n/a	weights n/a		N/A	152		1994-11-11
048	04	F	5	L	2	6	Y	2	1994-06-12	June 32.6g	Lice found 07/07/94					1994-07-07	25	1	1994-07-30	23
025	01	F	7	M	3	6	N	1	1994-06-06							N/A	148		1994-11-01
025	02	F	10	M	3	6	N	2	1994-06-06	June 18.6g	July 16.6g	August 16.6g	weights n/a	weights n/a		N/A	148		1994-11-01
025	03	M	5	S	3	6	N	3	1994-06-06	June 12.9g	July 9.4g	August 13.8g	weights n/a	weights n/a		N/A	148		1994-11-01
055	01	M	12	S	2	9	N	1	1994-08-09							N/A	82		1994-10-30
055	02	F	11	M	2	9	N	3	1994-08-09			August 24.1g	weights n/a	weights n/a		N/A	82		1994-10-30
055	03	F	9	M	2	9	N	3	1994-08-16			August 22.5g	weights n/a	weights n/a		N/A	75		1994-10-30
055	04	F	8	M	2	9	Y	2	1994-08-09			August 24.2g	weights n/a	weights n/a		N/A	82		1994-10-30
055	05	F	6	L	2	9	N	2	1994-08-09			August 25.0g	weights n/a	weights n/a		N/A	82		1994-10-30
055	06	M	5	S	2	9	N	1	1994-08-09							N/A	82		1994-10-30
041	01	M	6	S	3	6	N	1	1994-06-05							N/A	159		1994-11-11
042	01	F	12	L	3	6	N	3	1994-06-05	June 8.9g	July 8.0g	Lice found 22/07/94				1994-07-22	47		1994-07-22
042	02	F	10	L	3	6	N	1	1994-06-05			Lice found 11/07/94				1994-07-11	36	2	1994-11-11	111
042	03	F	8	L	3	6	Y	2	1994-06-05	June5.0g	weights n/a	weights n/a	weights n/a	weights n/a		N/A	159		1994-11-11
026	01	M	13	S	2	3	N	2	1994-06-12	June 38.8g	Lice found 25/06/94					1994-06-25	13	1	1994-09-05	72
026	02	F	12	M	2	3	N	1	1994-06-12				Lice found 25/09/94			1994-09-25	107	2	1994-10-03	8
026	03	M	8	S	2	3	Y	3	1994-06-12	June16.8g	July 36.5g	August 31.5g	weights n/a	weights n/a		1994-10-27	137	1	1994-10-30	3
										weights n/a = weight data not available						N/A = not applicable
										WD = withdrawn			lost = bottle lost
										DO = drop out

## Sheet: Sheet2
		Spray days	June				July				August					September				October
Household allocated	Number		Week 1	Week 2	Week 3	Week 4	Week 1	Week 2	Week 3	Week 4	Week 1	Week 2	Week 3	Week 4	Week 5	Week 1	Week 2	Week 3	Week 4	Week 1	Week 2	Week 3	Week 4
001	01		S1M2T2W2T1*F0	T2W2T2*F2	S2M2T2W0T2*F2	S2M2T2W2T1F1	S0M1T1W1T0*F1	S1M1T1W1T1*F1	S1M1T1W0T1*F2	S1M1T1W1T1*F2	S1M1T0W1T1*F1	S0M0T1W1T1*F1	S0M0T1W1T1*F1	S1M1T1W0T0*F0	S1M1T1W1T1*F1	S1M1THWHT1*F1	S0M0T0W1*THF1	S1*M1T0WHTHF0	S0M1T0W0T1F0	S1M1T1W1T1*F1	S1M1T1W1T1*F1	S1M1T1W1T1*F1	S1M1T1W1T1*F1
001	02		S1M2T2W1T1*F0	S0M0T1W1T1*F1	S1M1T1W0T2*F1	S2M2T2W2T1F1	S0M1T1W1T0*F1	S1M1T1W1T1*F1	S1M1T1W0T1*F2	S1M1T1W1T1F1*	S1M1T0W1T1*F1	S0M0T1W1T1*F1	S0M0T1W1T1*F1	S1M1T1W0T0*F0	S1M1T1W1TL
001	03		S* Th*	Th*	Th*	Th*	Th*	Th*	Tu*		Th*	Th*	Th*	Th*	Th*	Th*	W*	S*	S*	Th*	Th*	Th*	Th*
029	01				S1M1T1W0T1F2	S1M1*T1W1T1F1	S1M1T1W1T1F1	S1M1T1W1T1F2	S0M1T1W1T1F1	S0M1T1W1T1F1	S0M1T1W1T0F1	S0M1T1W1T1F2	S1M1T0W1T1F2	S1M1T1W1T1F0	S1M1T1W0T1F1	S0M0THWHT0F2	S1M1T1W1THF1	S1M1THWHT1F	S0M1T1W1T1*F2	S1M1T1W1T1*F1	S1M1T1W1T1*F1	S1M1T1W1T1*F1	S1M1T1W1T1*F1
029	02				S*	M*														Th*	Th*	Th*	Th*
029	03				S1*M1T1W0T1F2	S1M1*T1W1T1F0	S1M1T1W1T1F1	S1M1T1W1T1F2	S0M1T1W1T1F1	S0M1T1W1T1F1	S0M1T1W1T0F1	S0M1T1W1T1F2	S1M1T0W1T1F1	S1M1T1W1T1F0	S1M1T1W0T1F1	S0M1THWHT0F2	S1M1T1W1THF1	S1M1THWHT1F	S1M1THWHT1F1	S0M1T1W1T1*F2	S1M1T1W1T1*F1	S1M1T1W1T1*F1	S1M1T1W1T1*F1
002	01				S1*M1T1W1*T1F2	S1M1T1W1T1*F1	S0M1T1W1*T1F1	S1M1T1W1*T1F1	S0M1T1*W1*T1F1	S1*M1T1W1T1*F1	S0M1T1W1T0F2	S0M0T1W0T1F1	S0M1T1W1T0F1	S1M1T0W0T1F2	S0M1*T1W1T1*F1	S0M2THWHT1*F1	S0M1*T1W1THF1	S1*M1THWHT1F1	S0M1THWHT1*F0	S1M0T1W1T1*F1	S0M1T1W0T1*F0	S0M1T1W1T1*F1	S0M1T1W1T1F1
002	02				S*	Th*	S*W*		T**WL
003	01		M1*T1W1*T1F1	S1*M1T0W1*T0F1	S1M0*T0*W0*T0F0	S0M1*T1W1T0*F0
003	02		M1*T1W1*T1F0	S1*M1T1W1*T1F1	S1M1*T1*WL
003	03		S*W*WD
003	04		M*Th*	S*W*	Th*	Th*	M*Th*	Tu*		WD
004	01		S1*M1T1W1T1*F1	S1*M0T1W1*T1*F0	S1*M0T0W1T0*F0	S1*M1T1W0T1*F0	S1M1T1W0T1*F0	S2M1T0W0T1*F0	S0M0T0W1*T0F0	S1M1*T1W0T0F0	S0M1T1M1T0F0	S2M1T0W0T1F1	S0M0T0W1T1FL
004	02		S1*M1*T1W1T1*F2*	S1*M1T1W1*T1*F1	S1*M0T0WL
004	03		S*M*Th*	M*F*		S*Th*		M*W*						SL
030	01		S1*M1*T1*W1*T1*F1*	S1*M1*T1*W1*T1*F1*	S1*M2T0W0T0F0	S1*M1*T1*W1*T1*F1*	S1*M1*T1*W1*T1*F1*	S1*M1*T1*W1*T1*FL
030	02		S1*M1*T1*W1*T1*F1*	S1*M1*T1*W1*T1*F1*	S1*M1*T1W1*T1*F1*	S1*M1*T1*W*T1*F1*	S1*M1*T1*W0T1*F1*	S1*ML
037	01		S*M*W*Th	S*M*Tu*Th*F*	M*T*W*T*F*	S*M*T*W*	S*	S*M*W*T*F*	S*M*T*W*T*F	S*M*T*W*T*F	S*M*T*W*T*
037	02		S*M*T*W*T*F*	S*M*T*W*T*F*	T*W*F*	S*M*Tu*Th*F*	S*M*T*W*T*F*	S*M*T*W*T*F*	S*M*T*W*T*F*	S*ML
043	01			T1*W1*T1*F1	S1*M1T1W1*T1F1	S1M1*T1W0T1F1	S1M1*T1W1T1*F1	S1M1T1W1T1*F1	S1M1*T1W1T1*F1	S1M1T1W1T1F1*	S0M1*T1W1T1F1	S1M1*T1W1T1*F1	S1M1*T1W1T1F1*	S1M1T1W1T1F1*	S1M1*T1W1T1*F1	S1M1*THWHT1F1	S1M1*T1W1THF1	S1M1*THWHT1F1	S1M0THWHT1F1*	S1M1*T1W1T1*F1	S1M1*T1W1T1*F1	S1M1*T1W1T1*F1	S1M1*T1W1T1*F1
043	02			T1*W1*T1*F1	S1*M1T1W1*T1F1	S1M0*T1W1T1F1	S1M1*T1W1T1*F1	S1M1T1W1T1*F1	S1M1*T1W1T1*F1	S1M1T1W1T1F1	S0M1*T1W1T1*F1	S1M1*T1W1T1*F1	S1M1*T1W1T1F1*	S1M1T1W1T1F1*	S1M1*T1W1T1*F1	S1M1*THWHT1F1	S1M1*T1W1THF1	S1M1*THWHT1F1	S1M1THWHT1F1*	S1M1*T1W1T1*F1	S1M1*T1W1T1*F1	S1M1*T1W1T1*F1	S1M1*T1W1T1F1
043	03			Tu*W*Th*	S*W*		M*Th*	Th*	M*Th*	M*	M*Th*	Th*	M*F*	F*	M*	Th*	M*	M*	M*	S*M*T*W*T*F*	S*M*T*W*T*F*	S*M*T*W*T*F*	S*M*T*W*T*F*
005	01				S1*M1T1*W1T0*F0	S1M1T0W0T1F0	S0M0T0W0T0F0	S0M0T0W0T0F0	S0M0T0W0T0F0	WD
005	02				S1*M1*T1W1T1*F1	S0M0T0W0T0F0	S0M0T0W0T0F0	S0M0T0W0T0F0	S0M0T0W0T0F0	WD
005	03				S1*M0T0*W1T0*F0	S1M1T0W0T0F0	S0M0T0W0T0F0	S0M0T0W0T0F0	S0M0T0W0T0F0	WD
005	04				S0*M1*T0W1T0F0*	S0M0WD	WD
005	05				S*FL	WD
005	06									WD
054	01							T0*W1*T1F1	S0M1T1*W0*T0F1	S1M1T1W1T1F1	S0M1T1*W1T1F1	S1M0T1W0T0F0	S1M1T1W1T1F0	S1M1T1W1T1F1	S1M1T1W1T1F1	S1M1THWHT1F1	S1M1T1W1THF1	S0M0THWHT0F0	S1M0THWHT0F0	S0M1T1W1T1F0	S0M1T1W1T0F0	S0M0T0W0T0F0	S0M0T0W0T0F0
054	02							M1*T1*W0*T0F0	S0*M1T1W1T0F1	S1M1T1W1T1F1	S0M1T1*W1T1*F1	S0M0T0W0T0F0	S1M1T1W1T1F1	S1M1T1W1T1F1	S1M1T1W1T1F1	S1M1THWHT1F1	S1M1T1W1THF0	S0M0THWHT0F0	S1M0THWHT0F0	S0M1T1W1T1F0	S0M1T1W1T0F0	S0M0T0W0T0F0	S0M0T0W0T0F0
006	01		S*Th*		Th*	Th*	Th*	Th*	Th*	w*	Th*	Th*	WD
006	02	S1*M1T0W1T1*F1	S0M1T0W0T1*F0	S0M0T0W0*T0F0	S0M0T0W0T0*F1	S1M1T0*W1T1F1	S1M1T1W0T1F0	S0M1T1W0T0*F0	S0M1T0W0T0*F0	S0M0T0WL
006	03		S*Th*		Th*	Th*	Th*	Th*	Th*	WL
006	04	S1*M0T0W1T1F1*	S0M1T0W0T0*F0	S0M0T0W0*T0F0	S0M0T0W0T0*F1	S1M1T0W1T1F1	S0M1T1W0T0*F0	S0M1T1W0T0*F0	S0M1T0W0T0*F0	S0M0T0W0*T0F0	S0M0T0W0T0*F0	S0M0T0W0T0*F0	WD
006	05	S1*M0T0W1T1F*WD
007	01			Th1*F0	S1T*L	WD
007	02			T0*F0	S1M1*T1W1T0*F0	S1M1*T1*W0T0*F0	S0M0*T0W0T0*F0	S0M0*T0W0T0F0	WD
031	01		S1*M2*T1*W2T1*F1	S1M1T1*W1T1*F2*	S1M0T1*W1T1*F1	S1*M1*T0W1T1F1	S1M1*T1T1*T1F0	S1*M1T1*W1T0*F2	S1*M1T0W1T1*F1	S1M1T1W1T1F1	S1M1T1*W1T1*F1	S1M0*T1W1*T1F1	S1M1*T1W1T1*F1	S0M1W1W1T1F1	S1M1*T1W1T1*F1	S1M1THWHT0*F0	S1M1T1*W0THF1	S1M1THWHT1F0	S0M0THWHT1F1	S1*M1T1W1T1*F1	S0*M0T1*W1T1*F1	S1*M1T1W0T1F1	S0M0T0W0T0F0
031	02		S1*ML
008	01			M0*T0W0T0*F1	S0*M0*T0*W1TL
008	02			S1M1*T1*W1T1*F1	S1M1T1W1T1F1	S1M1T1W1T1F1	S2M2W1W2T2*F2	S2M1T2W2T2*F1	S2M2T2W2T1*F2	S2M2T2W1T2*F2	S0M0T0W0T0F0	S0M0T0W0T0F0	S0M0T0W0T0F0	S0M0T0W0T0F0	S0M0T0W0T0F0	S1M0THWHT1F1	S1M1T1W1THF1	S1M1THWHT1F1	S0M1THWHT1F1	S1M0*T0W1T0*F0	S1M0*T1W1T0*F0	S0M0T0W0T0F0	S0M0T0W0T0F0
008	03			S1M1T1W1T1F1	S1M1T1W1T1F1	S1M1T1W1T1F1	S1M1T1W1T1F1	S1M1*T1*W1*T1*F1*	S1*M1*T1*W1*T2F2	S1*M1*T1*W1*T2F2	S0M0T0W0T0F0	S0M0T0W0T0F0	S0M0T0W0T0F0	S0M0T0WL
008	04			M0*T0W0T1*F1	S0M0T0W1T0F0	S0M0T0W0T0F0	S2M1T2W2T1F2	S2M2T1W2T2F2	S2M1T2W2T2F1	S2M2T2W1T2F2	S0M0T0W0T0F0	S0M0T0W0T0F0	S0M0T0W0T0F0	S0M0T0WL
033	01
009	01		S1*M1*T1*W1*T1*F1*	S0M1*T1*W1*T1*F1*	S0M1*T0W1*T0F0	S0M0T0W0T1*F1*	S0M1*T1*W1*T1*F1*	S0M0T0W0T0F0	S1*M1*T1*W1*T1*F0	S1*M0T1*W1*T0F0	S0M0T1*W1*T0F0	S0M0T0W0T1*F0	S0M0T0W1*T0F0	S0M0T0W0T0F0	S1*M1*T1*W1*T1*F1*	S0M1*THWHT0F1*	S0M1*T1*W0THF0	S0M0THWHT0F0	S0M0THWHT0F1	S0M0T0W0T0F0	S0M0T0W0T0F0	S0M0T0W0T0F0	S0M0T0W0T0F0
044	01		S*M*Th*	S*Tu*W*	M*W*Th*	S*ML
044	02		S*M*Th*	Tu*W*	W*Th*	S*M*	S*Tu*Th*	S*M*W*	S*Tu*Th*	S*Tu*Th*				M*Th*	Tu*Th*	S*M*F*	S*Tu*W*	S*Th*	S*Th*	S*M*	S*M*Th*	M*Tu*Th*	S*Tu*W*
010	01		S*Th*	W*Th*	Tu*Th*	W*	Th*	M*Tu*Th*	Th*	M*Th*	W*Th*	M*Th*	S*M*	M*Th*	M*Th*	S*Th*	S*M*		M*Th*	S*Th*	Tu*	M*	S*
010	02		S0WD
010	03		S0WD
011	01	S*M*Th*F*	Tu*W*Th*F*	M*W*Th*F*	W*Th*	S*F*	S*M*T*W*T*	S*M*T*W*T*F*	M*T*W*F*	S*M*Tu*Th*	M*W*	S*M*T*W*T*	M*T*W*T*F*	S*M*W*Th*	S*M*Tu*W*Th*	S*M*F*	W*	Th*	S*M*Th*	Tu*Th*	M*Tu*W*	Th*	M*
011	02	S1*M1*T1*W1*T1*F1*	S1M1*T1*W1*T1*F1*	S0M1*T0W1*T1*F1*	S0M0T0W1*T1*F1*	S1*	S0M0T1*W1*T0*F0	S1*M1*T1*W*T1*F*	S1*M1*T1*W1*T0F*	S0M1*T0W1*T1*F*	S0M0T0W0T1*F1*	S1*M0*T0*W0*T1*F0*	S1*M0T0W0T0F0	S0M0T0W0TL
011	03	S*M*Th*F*	Tu*W*Th*F*	M*W*Th*F*	W*Th*	S*M*W*Th*	M*T*T*F*	S*ML
011	04	S1*M1*T1*W1*T1*F1*	S1M1*T1*W1*T1*F1*	S0M1*T0W1*T1*F1*	S0M0T0*W1*T1*F1*	S1*M0T0W0T0F0	S0M*TL
011	05	S1*M1*T1*W1*T1*F1*	S1M1*T1*W1*T1*F1*	S0M1*T0W1*T1*F0*	S0M0T0W1*T1*F1*	S1*M0T0W0T0F0	S1*M1*T1*W0T1*F0	S1*M1*T1*W1*T1*F1*	S0M1*T1*W0T1*F0	S1*M1*T1*W1*T1*F1*	S0M1*T1*W1*T1*F1*	S1*M1*T1*W1*T0F1*	S0M1*T1*W1*T1*F0	S1*M1*T1*W1*T1*F0	S1*M1*T1*W1*T1*F0	S0M0THWHT1*F0	S0M0T1*W0THF0	S*M0THWHT*F*	S0M0THWHT1*F0	S0*M0*T0W1*T*F0	S0M0*T1*W0*T0F0*	S0M0*T0*W0T0*F0	S0*M0*T0W0T0*F0
039	01		Th*	S*Th*	S*Th*	S*Th*	S*Th*	S*Th*	S*Th*	S*Th*	S*Th*	FL
012	01			W*Th*F*	S*Tu*Th*F*	S*ML
012	02			W1*T1F1*	S1M0T1*W1*T1*F1	S1M1*T1W1*T1F1	S1M1*T1W1*T1F1*	S1*M1*T1W1T1*F1	S1*M1*T1W1T1F1	S0M1*T1W1T1F1*	M1*T1W1T1F1	S0M1*T1W1T1F1	S1*M1T1W1T1F1*	S1*M1T1W1T1F1	S1M1T0W0T1*F1	S1M1THWHT1F1*	S1M1T1W1*THF1	S1M1*THWHT1F1	S1M1THWHT1F1	S1M1T1*W1T1F1	S1M1T1*W1T1F1	S1M1T1W1T1F1	S1M1*T1W1T1F1
027	01			S1M1T1*W1T1*F1	S1*M1T1W1T1*F1	S0*M1T1*W1T1*F1	S1*M1*T1W1T1*F1	S1*M1T1W1*T1F1	S0*M1T1W1*T1F1	S1*M0T1W0T1*F1	S0M1T0W1*T1F1*	S1*M1T1W0T0F1*	S1M0T0*W1T1F1*	S0M1T0W1T1F1*	S1M1T1*W1T0F1	S0M1THWHT1F1	S0M1T1W1THF1	S0M0THWHT1*F1	S0M0THWHT0F1*	S0M1T1W1T1*F1	S0M1T1W1*T1F1	S1*M1T1W1*T1F1	S0M1*T1W1T1F1
027	02			M1T1*W1T1*F1	S1*M1T1W1T1F1*	S1*M1TL
013	01		Tu0DO
013	02		Tu*W*Th*	S*M*T*W*T*	S*M*T*W*T*	S*M*Tu*Th*	S*M*T*W*T	S*M*T*W*T*F*	S*	Th*L
013	03		T1*W1T1*F0	S1M1T1*W1T1*F0	S1M1T1*W1T1*F0	S0M1T1*W0T0F0	S1*M1T1*W1T1F0	S1M1T1*W1T1*F0S1M1*T0W0T0F0		S0M0T0W0T0F0	S0M0T0W0T0F0	S0M0T0W0T0F0	S0M0T0W0T0F0	S0M0T0W0T0F0	S0M0T0W0T1*F1*	S0M1*THWHT1*F1	S0M0T1*W0THF0	S0M0THWHT0F0	S0M0THWHT0F0	S1M*T1W0T1F*	S1M1T1W0T1F0*	S1M0T1W0T1F0*	S1M1T1*W0T1F0*
013	04		Tu*W*Th*	S*M*T*W*T*	S*M*T*W*T*	S*M*Tu*Th*										S*M*TuHWHTh*	Tu*			S*Tu*Th*	S*M*Tu*Th*	S*Tu*Th*	S*ML
014	01			S1*M1*T1*W1*T0F0	S0M1*T1*W1*T1*F0	S0M0T0W0T1*F1*	S1M0T1*W1T0F1*	S1M1T0W1T0F1	S0M1T0W1*T0F0	S0M0T0W0T0F0	S0M0T0W0T0F0	S0M0T0W0T0*F0	S0M0T0*W0T0F*	S0M0T0*W0T1*F0	S0M0*T0W0T0F0	S0M0T0W0T0F0	S0M0T0W0T0F0	S0M0T0W0T0F0	S0M0T0W0T0*F0	S0M0*T0W0T0F0	S0M0T0W0T0F0	S0M0T0W0*T0F0	S0M0T0*W0T0F0
014	02				FL
014	03			M*T*W*T*F	S*M*T*W*T*F*	S*F*	M*Tu*Th*	S*Tu*F*	W*			W*Th*	S*Tu*	M*W*F*	M*W*	S*				M*	Th*		Tu*
014	04			S1*M1*T1*W1*T0F1*	S0*M1T0*W1*T1*F1	S0M0T0*W0T0F1	S0*M1T1W0*T1F0*	S1M1*T1W1T1*F1	S0M1*T1*W1*T1*F1*	S0M0T0W0T0F0	S0M0T0W0T0F0	S0M1T0W0*T0F0*	S0M0*T1W0*T0*F0	S0*M0T1*W0T0*F0	S0M0T1*W0T0F0*	S0M0THWHT0F0	S0M0T0W0THF0	S0M0THWHT0F0	S0M0THWHT0F0	S0M0*T0W0T0F0	S0M0T0W0T0F0	S0M0T0W0T0F0	S0M0T0*W0T0F0
046	01			W0*Th0*F1*	S1M1T1*W1T1F1*	S1M1T1*W1T1F0	S0M0T0W0T0F0	S0M0T0W0T0F0	S0M0T0W0T0F0	S0M0T0W0T0F0	S0M0T0W0T0F0	S0M0T0W0T0F0	S0M0T0W0T0F0	S0M0T0W0T0F0	S0M0T0W0T0F0	S0M0THWHT0F0	S0M0T0W0THF0	S0M0THWHT0F0	S0M0THWHT0F0	S0ML
046	02			W*Th*F*	Tu*F*	Tu*
057	01												T1W1T1F1*	S1M1T1W1T1F0*	S1M1T1W1T0F0	S0M0THWHT0F0	S0M0T0W0THF0	S0M0THWHT0F0	S0M0THWHTL
047	01			S1*M1T1*W1T1*F1	S1M1*T1*W1T1*F1	S0M1T1*W1T1*F0	S1M1T1*W1T1F1*	S0M1T1*W0T0F0	S0M1*T1W0T0F0	S0M0T0W0T0F0	S0M0T0W0T0F0	S0M0T0W0T0FL
047	02			S0*M1T1*W1T1*F1	S1*M1T1*W1T1*F1	S1*M1T1*W1T1*F0	S1M1*T1W1T1F1*	S0M1T1*W0T0F0	S0M1*T1W0T0F0	S0M0T0W0T0F0	S0M0T0W0T0F0	S0M0T0W0T0F0	S1*M0T0W0T0F0	S0M0T0W0T0F0	S0M0T0W0T1*F1*	S1*M1THW1T1*F0	S1M0T0W1*THF0	S1*T0WHTHT0*F0	S0*M0THWHT1*F0	S0*M1T0W0T1*F0	S0*M1T0W1T0*F0	S0M0T1W0T1*F0	S1*M0T0W1T0*F0
050	01			S*Tu*Th*	M*Tu*Th*	S*Th*	F*F*	Tu*	M*				S*		SL
050	02			S*Tu*Th*	M*Tu*Th*	S*Th*	F*F*	Tu*	M*				S*		SL
015	01											WD
015	02	S*M*T*W*T*F*	S*Th*F*	S*M*T*W*T*	S*M*T*W*T*F*	S*M*T*W*T*	S*M*T*W*T*F*	S*M*T*W*T*F*											F*	S*M*T*W*T*F*	S*M*T*W*T*F*	S*M*T*W*T*F*	S*M*T*W*T*F*
015	03	S1*M1*T1*W1*T1*F1*			TL
015	04	S1*M2*T1*W1*T1*F1*	S1*M1*T1*W1*T2*F1*	S1*M1*T1*W1*T1*F1*	S1*M1*T1*W1*T1*F1*	S1*M1*T1*W1*T1*F1*	S1*M0*T0*W0*T0*F1*	S0*M0*T1*								S0M0THWHT0F0	S0M0T0W0THF1*	S0M0THWHT0F0	S0M0THWHT0F0*	S0M0TL
015	05	S1*M2*T1*W1*T1*F1*	S1*M1*T1*W1*T1*F1*	S1*M1*T1*W1*T1*F1*	S1*M1*T1*WL
028	01		M*	S*Tu*Th*F*	M*F*	M*Th*	Th*								DO
052	01			S0*M1*T1W1T1*F0	S1M1T1*W1T1*F1	S0*M1*T1W1T1F1*	S1*M1T1W1T1*F1	S1M0*T1*W1*T1*F1*	S1*M1*T1*W1T1*F1	S1M1*T1W1*T1F1*	S0M1*T1W1T1F1	S1*M1T1*W0T1*F1	S0*M1T0W1T1*F0	S0M1T1*W1T1F1	S1M1T1W1					S0M0*T0W0T0F0	S0M0T0W0T0F0*	S0M0T0*W0T0F0	S0M0T0*W0T0F0
052	02			M1*T0W1T1*F0	S1*M1T1*W1T1*F1	S0*M1T1W1T1F1*	S1*M1T1W1T1*F1	S1*ML
052	03			S1*M1*T0W1T1*F0	S1*M1T1*W1T1*F1	S0*M1T1W1T1								TuL
049	01			T1*W1T1F1*	S1M1*T1W1T1*F1	S1*M0T0W0*T0F0	S1*M1T1W1T1F1	S1*M1T1*W1T1F1*	S1M1T1*W1T1F1*	S1*M0T0W0T0F0	S0M0T0W0T0F0	S0M0T0W0T0F0	S0M0T0W0T0F0	S0M0T0W0T0F0	S0M0T0W0T0F0	S1*M1THWHT1F1*	S1M1T1*W1THF1	S1*M0THWHT1F1*	S1M1*THWHT1F1*	S1M1T1W1T1F1*	S1M1T0W0T1*F1	S1*M1T1W1T1F1	S1M1T1*W1T0F1
049	02			T1*W1T1F1*	S1M1*T1W1T1*F1	S1*M1T1T1*TL
049	03			T1*W1T1F1*	S1M1T1*W1T1F1*	S0M1*T1W1T1*F1	S1*M1T1*W1T1F1*	S1*M1T1*W1T1F1*	S1*M1T1*W1T1F1*	S1*M1T1*W1T1F1*	S1*M1T1*W1T1F1*	S1M1T1*W1T1F1*	S1M1T1W1T1F1	S1M1T1*W1T1F1	S1*M1T1W1T1F1*	S0M1*THWHT1F1*	S1M1T1*W1THF1	S1*M1THWHT1F1*	S1M1*THWHT1F1*	S1M1T1*W1T0F1*	S1M1*T1W1T1F1*	S0M1T1*W1T1F1	S0M1T1*W1T1F1
049	04			T*F*	S*Tu*F*	S*Tu*F*	Tu*Th*
051	01			Tu*F*	S*Tu*F*	S*Tu*F*	Tu*ThL	S*F*	Tu*F*	S*Tu*F*	F*	F*	S*W*	S*	M*	S*F*	Tu*	S*F*	F*	Tu*F*	M*F*	Tu*	S*F*
016	01	S1*M1*T1W1T1*F2	S1M1T1*W0T1*F1*	S0M1*T1W0T0*F2	S1M1T1*W1T0*F2	S0*M1T1W1T1*F2	S1M0T1*W1T1*F2	S1*M1T1W1T1*F2	S1M1T1*W1T1*F2	S1M1T0W0T0*F0					T2*F1	S0M0*THWHT0*F0	S0M1T1W0*THF0*	S0M0*THWHT0*F1	S1M0*THWHT1F2	S0M1T1W1T0F2*	S1M1T1W1T1*F1	S1M0T1W0T1F0*	S0M0T0W1T1F0
016	02	S1*M1*T1W1T1*F2	S1M1TL
016	03	S1*N1T1W1*T1*F2	S1M1T1*W0T1*F1*	S1M1*T1W0T0*F2	S1M1T1*W1T0*F2	S1M1T1*W1T1*F1*	S1*M1T1*W1T1*F2	S1*M1T1W0T0F0*	S0M0T1*W1T1*F2	S1M1T1W0T0*F1	S0				T2*F1	S0M0*THWHT0*F0*	S0M1T1W0*THF0*	S0M0*THWHT0*F1	S1M0*THWHT1F2	S0M1T1W1T0F2*	S1M1T1W1T1*F1	S1M0T1W0T1F0*	S0M0T0W1T1F0
016	04	S*M*Th*F*	Tu*Th*	M*F*	Tu*Th*	Tu*Th*F*	Tu*Th*	S*M*Tu*W*F*	Tu*Th*	Th*	WL
017	01		T1W2T1F1*	S1M1*T1W1T1*F1	S1M1T1W1T1*F1	S1M1T1W1T1*F1	S1M0T1W1T1*F1	S1M1T1W1T1*F1	S0M0T1W1T1F0						ThL
017	02		S1*M1T1W1T1*F1	S1M1*T1W1T1*F1	S1M1*T1W1T1F1	S1M1T1W1T1*F1	S1M0T1W1T1*F1	S1M1T1W1T1*F1	S0M0T1W1T1F0						ML
017	03		S*M*Th*	M*Th*			Th*	Th*	ThL
017	04		S1*M1T1W1T1F2*	S1M1T1W1T1F1*	S1M1T1W1T1F1	S1M1T1W1T1F1	S1M1T1W1T1F0	S1M1T1W1T1F1	S0M0T1W1T1F0										ThL
017	05		S*M*Th*	M*Th*	Th*		Th*		Th*						ThL
018	01		Th*	M*Th*	M*Th*	M*Th*	Tu*Th*	Tu*Th*	Tu*Th*				Tu*Th*	Tu*Th*	Tu*Th*		Tu*W*			Tu*Th*	Tu*Th*	Tu*Th*	Tu*Th*
018	02		T0W0T1*F1	S1M1*T1W1T1*F1	S1M1*T1W1T1*F1	S1M1*T1W1T1*F0	S1M0T1*W1T0*F0	S1M0T1*W0T1*F0	S1M1T0WHT0F0	S0M0T0W0T0F0	S0M0T0W0T0F0	S0M0T0W0T1*F0	S1M1T1*W0T1F0	S1M1T1*W0T1*F0	S1M1T1*W0T1*F0	S0M0THWHT0F0	S0M0T1*W1*THF0	S0M0THWHT0F0	S0M0THWHT0F0	S0M1T1*W1T1*F0	S0M1T1*W0T1*F0	S0M1T1*W0T1*F1	S0M0T1*W1T1*F0
018	03		T1W1T1*F1	S1M1*T1W1T1*F1	S1M1*T1W1T1*F1	S1M1*T1W1T1*F0	S1M0T1*W1T1*F1	S1M1T1*W1T1*F0	S1M1T1*W0T1*F0	S0M0T0W0T0F0	S0M0T0W0T0F0	S0M0T0W0T0F0	S0M0T0W1T1*F0	S1M1T1*W1T0F0	S1M1T1*W0T0F0	S0M0THWHT0F0	S0M0T0W0THF0	S0M0THWHT0F0	S0M0THWHT0F0	S1M0T1*W1T1*F0	S0M1T1*W0T1*F0	S0M1T1*W0T1*F1	S0M0T1*W1T1*F0
036	01		Th*	M*Th*	M*Th*	M*Th*	Tu*Th*	Tu*Th*	Tu*Th*	Tu*Th*	Tu*Th*	Tu*Th*	Tu*Th*	Tu*Th*	Tu*Th*					Tu*Th*	Tu*Th*	Tu*Th*	Tu*Th*
019	01		M1*T1W1T1*F1	S1*M1T1W1T1*F1	S1M1T1*W1T1*F0	S1M1T1*W1T1*F0	S1M1T1*W1T1*F1	S1M1T1*W1T1*F1	S1M0*T1W1*T1F1	S0M1T1*W1*T1F0	S1M1T1*W1*T1F1	S1M1T1*W1*T0F1	S1M1T1*W1*T1F1	S1M1T1W1T0F1	S0M1T1W0T1*F1	S0M1THWHT0F0	S1*M1T1W1*THF1	S1M0THWHT0F1*	S1M0THWHT1*F1	S1M1T0W1T1*F1*	S0M1T1*W1T1*F0	S0M1T1*W1*T1F1	S1M1T1W0T1*F1
019	02		M1*T1W1T1*F1	S1*M1T1W1T1*F1	S1M1T1*W1T1*F0	S1M1T1*W1T1*F0	S1M1T1*W1T1*F1	S1M1*T1W1T1*F1	S1M1T1*W1T1*F1	S0M1T1*W1*T1F0	S1M1T1*W1T1F1*	S0M1T1*W1T1*F1	S1M1T1*W1*T1F1	S1M1T1W1T0*F1	S1M0T0W0T1*F1*	S0M1THWHT0F0	S1M0T1W1THF0	S1M0THWHT1*F1	S1M1THWHT1*F1	S1M1T1W1T1F1*	S1M1T1*W1T1F1*	S1M1T1*W1T1*F0	S1M1T1*W1T1F1*
019	03		1*T1W1T1*F1	S1*M1T1W1TL
019	04		M*Th*	S*Th*	Tu*	Tu*Th*	Tu*Th*	Tu*Th*	Tu*Th*	Tu*Th*	Tu*F*				F*	Th*		Th*			TuL
034	01		S*Th*	Th*	Th*	Th*	Th*	Th*	Th*	Th*	Th*	Th*	Th*	Th*	Th*	Th*	WL
034	02		S*Th*		ThL
034	03		S*Th*	Th*	Th*	Th*	Th*	Th*	Th*	Th*	Th*	Th*	Th*	Th*	Th*	Th*	F*	Th*	Th*	Th*	ThL
034	04		S*Th*	Th*	Th*	Th*	Th*	Th*	Th*	Th*	Th*	Th*	Th*	Th*	Th*	F*		Th*F*	Th*	Th*	Th*	Th*	Th*
034	05		S*Th*	Th*	Th*	Th*	Th*	Th*	Th*	Th*	Th*	Th*	Th*	Th*	Th*	F*		Th*	Th*	Th*	F*	Th*
020	01		M1T1*W1*T1*F1	S1*M1T1*W1T1*F1	S1*M1T1*W1T1*F1	SL
020	02		M1T1*W1T1F1*	S1*M1T1*W1T1F1*	S1*M1T1*W1T1F1*	S1*M0T0*W0T0F1	S0M0T0*W0T0F0	SL
020	03		S*Tu*Th*	S*Tu*Th*	S*Tu*Th*	SL
020	04		S1*M1T1*W1T1*F1	S1*M1T1*W1T1*F1	S1*M1T1*W1T1*F1	SL
020	05		S1*M1T1*W1T1*F1	S1*M1T1*W1T1*F1	S1*M1T1*W1T1*F1	S1*M0T0*W0T0*F0	S0M0T0*W0T0F0	S1*M1T0W0T0Fwd
020	06		S1*M1T1*W1T1*F1	S1*M1T1*W1T1*F1	S1*M1T1*W1T1*F1	S1*M0T0*W0T0*F0	S0M0*T0W0T0*F0	S0M0*T0W0T0Fwd
020	07		M1T1*W1*T1*F1	S1*M1T1*W1T1*F1	S1*M1T1*W1T1*F1	SL
053	01				S1*M1T1W1T1F0	S1*M1T1W1T1F0	S0M0T1W1T1*F1	S1M1T1W1*T1F1*	S0M0T1W1*T1F1	S1M1T1W1T1F0	S1M1T1W1*T1F0*	S1M1T1W1*T0F0	S0M0T0W1T1F1*	S1M1T1W1*T1F1	S1M0T1W1T0F1	S0M1THWHT1*F1	S0M1T1W1*THF1	S1M1THWHT1F1	S1M0THWHT1F1	S1M1T1W1T1F1*	S1*M1T1W1T1F1	S1M1*T1W1T1F1	S1*M1T1W1T1*F1
053	02				S1*M1T1*W1T1F1*	S0M1*T1W1T1F0	S0M1*T1*W1T1F1	S1*M1T1W1T1F1	S0M0*T1W1T1F0	S1*M1T1W1T1F1	S1*M1*T1W1T1F1	S1M1T1W0T1F0	S0M0T0W1T1F1*	S1M1T1W1T1F1	S1M0T1*W1T1F1	S1M1THWHT1*F1	S0M1T1W1*THF1	S1M1THWHT1F1	S0M0THWHT1F1	S1M1T1W1T1*F1	S1M1T1W1T1F1	S1M1*T1W1T1F1	S1*M1T1W1T1*F1
053	03				S1*M1T1*W1T1F1*	S0M1T1*W1T1*F1*	S0M1T1*W1T1F1	S1*M1T1*W1T1F1*	S0M0T1W1T1F1	S1*M1T0W0*T1*F1	S1M1T1*W1T1F1*	S1M1T1W0T1F0	S0M0T0W1T1F1*	S1M1T1*W1T1F1	S1M0T1*W1*T1F1	S1M1THWHT1*F1	S0M1T1W1*THF1	S1M1THWHT1F1	S1M0THWHT1F0	S1M0T1W1T1*F1	S1M1T1W1T1F1	S1M1*T1W1T1F1	S1*M1T1W1T1*F1
045	01			T2*W2*T2F2	S0M2*T2W1*T2F2	S2*M2*T2W2T2F0	S1M1T1W1*T1F1	S1M1T0W1*T0F0	S0M0T0*W1T1F1	S1M0T1W0T0F1	S1M0T0W0T0F0	S0M0T1W1T0F0	S1M0T0W0T1F0	S1M1T1W1T1F1	S1M1T1W1T1F1					S0M0T1W0T0F0	S0M1*T0W0*T0F0	S1M1T0W0T1F1	S1M1T1W1T1F1
021	01			S1*M1T1W1T1F1	S1*M1T1W0T0F0	S0M0T0W0T0F0	S0*M0T0W1T1F1	S0*M1T1W1T0*F0	S0*M1T0W1*T0F1	S1*M1T1W0T1F1	S0M0T0W1*T0F0	S0*M1T0W1T0*F0	S0*M0T1W0T1*F0	S0*M0W0*T0F1	S0*M0T1W0T1F1	S0M1THWHT0F0	S0M1T1W1T1F0	S1M0T1W1T1F0	S1M0T1W1T0F0*	S1*M1T1W1T1*F1	S1*M1T1W1T1*F1	S1*M1T1W1T1*F1	S1*M1T1W1T1*F1
035	01						F*	S*	S*							Th*	Tu*		F*	S*Th*	S*Th*	S*Th*	S*Th*
035	02			W*	Tu*		Th*	S*Th*	S*	S*F*	W*	S*Th*	S*Th*	S*W*	S*M*Tu*W*Th*	Th*	Tu*		F*	S*Th*	S*Th*	S*Th*	S*Th*
022	01		S*M*Th*	Tu*	Th*	M*									Swd
022	02		S0*M1*T0W1T0*F1	S1M1T1*W0T0F0	S0M0T0W1T1*F1	S0M1*T0W0*T0F0									Swd
022	03		S1*M1*T0W1T0*FL
023	01		S1*M1T1*W0T1*F2	S1*M1T1*W1T0*F1	S1*M0T1*W1T0*F0	S0*M1T1*W0T0*F1	S0M1T1W1T0F1	S1*M1T1*W1T0F1	S1*M1T1*W1T1F1*	S0M1T1*W0T1F1	S0M0T0W1T1F0	S0M1T1W1T1F1	S1M0T0W0T0F0	S0M1T1W1T1F1	S1M1T1W1T0F0	S0M0T0W0T0F0	S0M0*T0W0T0F0	S0M0T0W0T0F0	S0M0T0W0T0F0	S1*M1T1*W0T1F1	S0M1T1W1T0*F1	S1*M1T1*W1T0F1	S0M1T1*W1T0F1
023	02		S1*M1T1*W0T0*F1	S1*M1T1*W0T0*F0	S1*M0T1*W1T0*F0	S0M1T1*W0T0F1	S0M1T1W0T0F1	S1*M1T1*W1T0F1	S1*M1T0W0T0F0	S0M0T1*W0T1F1	S0M0T0W1T1F0	S0M1T1W1T1F1	S1M0T0W0T0F0	S0M1T1W1T1F1	S1M1T1W1T0F0					S1*M1T0W0T1F1	S0M1T1W1T0*F1	S1*M1T1*W1T0F1	S0M1T1*W1T0F1
023	03		S1*M1T1*W0T1*F1	S1*M1T1*W1T0F1	S1*M0T1W1T0F0	S0M1T1*W0T0F1	S0M1T1W1T0F1	S1*M1T1*W1T0F1	S1*M1T1*W1T1F1*	S0M1T1*W0T1F1	S0M0T0W1T1F0	S0M1T1W1T1F1	S1M0T0W0T0F0	S0M1T1W1T1F1	S1M1T1W1T0F0		S0M0*T0W0T0F0			S1*M1T1*W0T1F1	S0M1T1W1T0*F1	S1*M1T1*W1T0F1	S0M1T1*W1T0F1
023	04		S1*M1T1*W0T1*F1	S1*M1T1*W1T0F1	S1*M0T1W1T0F0	S0M1T0W0T0F1	S0M1T1W1T0F1	S1*M1T1*W1T0F1	S1*M1T0W0T0F0	S0M0T1*W0T1F1	S0M0T0W1T1F0	S0M1T1W1T1F1	S1M0T0W0T0F0	S0M1T1W1T1F1	S1M1T1W1T0F0					S1*M1T0W0T1F1	S0M1T1W1T0*F1	S1*M1T1*W1T0F1	S0M1T1*W1T0F1
032	03		T1W2T2*F2	S1*M1*T1W2T2*F2	S1*M1*T1W1T1*F2	S1*M1*T1W1T1F1	S1*M1*T1W1T1*F1	S1*M1T1*W1T1*F1	S1M1T1W1T1*F2	S1M1*T1W1T1F1*	S1M0T1W1T1F1*	S1*M1T1W1*T1F1	S0*M1T1W1*T1F2	S1*M1T1*W1T1F1*	S1M1T1W1*T1F1*	S1M1THWHT1*F1	S1M1*T1W1THF1	S1M1*THWHT1*F1	S1M1THWHT0F1	S1M1*T1W1T1F1	S1M1*T1W1T1*F1	S1M1*T1W1T1F1	S1M1T1W1T1F1
038	01		S*Th*	S*M*Th*	S*M*Th*	S*M*	S*M*Th*	S*W*Th*	Th*	F*	F*	S*W*	S*W*	S*Tu*F*	W*F*	S*M*Th*	S*M*Tu*	M*F*		M*	M*Th*	M*
038	02		M*Th*	S*M*Th*	S*M*Th*	S*M*	S*Th*	Tu*Th*	Th*	M*F*		S*W*	S*W*	S*Tu*F*	W*F*	Th*	M*	M*F*		M*	M*Th*	M*
040	01					S*Th*		S*	M*	M*	Th*	Tu*	Tu*	Th*	Tu*	S*M*F*	F*	M*	M*	S*Th*	S*Th*	S*Th*	F*
040	02				S*	S*Th*		S*	M*	M*	Th*	Tu*	Tu*	Th*	Tu*	Th*			Thwd
040	03				S*W*	S*		S*	M*	M*	Th*	Tu*	Tu*	Th*	Tu*	Th*	Tu*F*	M*Th*	M*Th*	Tu*FL
024	01		S1*M1T1W1T1*F1	S1*M1T1W1T1*F1	S1*M1T1W1T1*F1	S1*M1T1W1T1F1	S1M1T1W1T1F0	S1M0T1W1T0F1*	S1M0T0W1*T0F0	S1M1T0W1T1F1	S0M1T1W1T0F1	S0M1T1W1T0F1	S1*M1T0W0T0F1	S1						S0M0T0W0T0F0	S0M1
024	02		Th*	S*Th*	S*Th*	S*Th*		F*				S*
024	03		S1*M1T1W1T1*F1	S1*M1T1W1T1*F1	S1*M1T1W1T1*F1	S1*M1T1W1T1F1	S1M1T1W1T1F0	S1M0T1W1T0F1*	S1M0T0W1*T0F0	S1M1T0W1T1F1	S0M1T1W1T0F1	S0M1T1W1T0F1	S1*M1T0W0T0F1	S1						S0M0T0W0T0F0	S0M1
024	04		S*Th*F*	S*Th*	S*Th*	S*Th*		F*	M*W*			S*
024	05		S1*M1T1W1T1*F1	S1*M1T1W1*T1F1	S0M1T1*W1T1*F0*	S0M1T1W1T1F1	S1M1T1W1T1F0	S1M0T1W1T0F1*	S1M0T0W1*T0F0	S1M1T0W1T1F1	S0M1T1W1T1F1	S0M1T1W1T0F1	S1*M0T0W0T0F1	S1						S0M0T0W0T0F0	S0M1
048	01			S*ML
048	02			M1*T1*W1*T1*F0	S0M1*T1*W1*T0F0	S0M1*T1*W1*T0F0	S0M0T0W1T0F0	S1*M1*T1*W1*T1*F1*	S0M1*T0W1*T0F0	S1*M1*T1*W0T1*F1*	S0M1*T0W1*T0F1*	S1*M0T1*W1*T1*F1*	S1*M0T0W0T0F1*	S0M0T1*W1*T0F0	S0M1*T0W1*T1*F1*	S0M1*THWHT0F1*	S0M1*T1*W0THF1*	S0		S1*M1*T1*W1*T1*F0	S0M1*T0W1*T1*F0	S0M0T0W0T1*F0	S0M1*T1*W1*T0F0
048	03			S0*M1*T1*W0T1*F0	S0M1*T1*W1*T0F0	S0M1*T1*W1*T0F0	S0M0T0W1T0F0	S1*M1*T1*W1*T1*F1*	S0M1*T0W1*T0F0	S1*M1*T1*W1*T1*F1*	S0M1*T0W1*T0F1*	S1*M0T1*W1*T1*F1*	S1*M0T0W0T1*F1*	S0M0T1*W1*T0F0	S0M1*T0W1*T1*F1*	S0M1*THWHT0F1*	S0M1*T1*W0THF1*	S0		S1*M1*T1*W1*T1*F0	S0M1*T0W1*T1*F0	S0M0T0W0T1*F0	S1*M1*T1*W1*T0F0
048	04			M*T1*W1*T1*F0	S1*M1*T1*W1*T1*F1*	S0M1*T1*W1*T0F0	S0M0T0W1TL
025	01		M*Tu*Th*F*	S*Tu*Th*	S*Tu*Th*	S*Tu*Th*	S*Tu*F*	S* - chicken pox		S*W*	S*Tu*Th*	Th*	F*	M*Tu*F*	M*Th*	S*Th*	S*	S*	Th*	M*F*	M*	M*Th*	Th*
025	02		M1*T1*W2T1*F1	S1*M1T1*W2T1*F1	S0*M1T1*W2T1*F1	S1*M1T1*W2T1*F0	S1*M1T1*W1T2F0*	S1*M1T1*W1T1F1	S0M1*T1W1*T1F1	S1*M1T1W1*T1F1	S1*M1T1*W1T1*F1	S1M1T1*W1T1*F1	S1*M1T1W1T1F1*	S1M1*T1*W1T1F1*	S1M1*T1W1T1*F1	S0M1THWHT1*F0	S1*M1T1W1*THF1	S0*M1THWHT1F1	S1*M1THWHT1F1*	S1M1*T1W0T1F1*	S0M1T1*W1T1F1	S1M1*T1W1T1*F1	S1M1T1W0T1*F0
025	03		M1*T1*W1T1*F1	S1*M1T1*W1T1*F1	S1*M1T1*W1T0*F1	S1*M1T1*W1 - chicken pox	F1*	S0*M1T1*W1T1F1	S0M1*T1W1*T1F1	S1*M1T1W1*T1F1	S1*M1T1*W1T1*F1	S1M1T1*W1T1*F1	S1*M1T1W1T1F1*	S1M1*T1*W1T1F1*	S1M1*T1W1T1*F1	S1*M1THWHT1F1*	S1*M1T1*W1THF1	S1M1*THWHT1F1	S1*M1THWHT0F1*	S1M1T1W1T0F1*	S0M1T1*W1T1F1	S1M1*T1W1T0*F1	S1M1T1W0T1*F1
055	01											Tu*F*	S*F*	Tu*F*	W*	M*F*	Tu*	F*	M*F*	F*	Th*		Th*
055	02											T1*W1T1F1*	S1*M1T1W1T1F1*	S1M1*T1W1T1F1*	S1M1T1W1*T1F1	S1M1*THWHT1F1*	S1M1T1*W1THF1	S1M1THWHT1F1*	S0M1*THWHT1*F1	S1M1T1W0T0F1*	S1M1T1W1T1F1	S1M1*T1W1T1W1	S0M1T1W1T1*F1
055	03												T1W1T1F1*	S1M1*T1W1T1F1*	S1M1T1W1*T1F1	S1M0*THWHT1F1*	S0M1T1*W1THF1	S1M1THWHT1F1*	S1M1*THWHT1*F1	S1M1T1W1T1*F1	S1M1T1W1T1F1	S1M1T1W1T1F1	S0M1T1W1T1*F1
055	04											W1T1F1*	S1*M1T1W1T1F1*	S1M1T1*W1T1F1*	S1M1T1W1*T1F1	S1M2*THWHT1F1*	S0M1T1*W1THF0	S1M1THWHT1F1*	S1M1*THWHT1F1*	S1M1T1W1T1F1*	S1M1T1W1T1F1	S1M1T1W1T1F1	S0M1T1W1T1*F1
055	05											T1*W1T1F1*	S1*M1T1W1T1F1*	S1M1T1*W1T1F1*	S1M1T1W1*T1F1	S1M2*THWHT1F1*	S1M1T1*W1THF1	S1M1*THWHT1F1	S1M1*THWHT1F1*	S1M1T1W0T0F1*	S1M1T1W1T1F1	S1M1T1W1T1F1	S0M1T1W1T1*F1
055	06											Tu*F*	M*F*	M*Th*	W*	M*F*	Tu*	F*	M*Th*	F*	Th*		Th*
041	01		S*M*Tu*W*Th*	M*W*	W*F*	S*Th*	M*Tu*	S*M*F*	M*Tu*W*	Th*	S*M*	S*Tu*Th*	S*Tu*Th*	S*Tu*Th*	S*Tu*Th*F*	S*F*	M*Tu*F*	S*M*	Th*	S*	S*M*W*	S*M*Tu*W*	S*Tu*
042	01		DATA MISSING	DATA MISSING	DATA MISSING	DATA MISSING	S1M0T1W0T1F0	S1M0T1W0T1*F0	S1M0T1W0T1FL
042	02		S*Tu*Th*	S*Th*	M*W*F*	S*W*	S*Tu*Th*	S*ML
042	03		S1*M0*T1*W1*T1*F0	S1*M1*T0W1*T1*F0	S1*M0T1*W0T1*F0	S1*M0T1*W1*T0F0						S1M0T1W0T1F0	S1M0T1W0T1F0	S1M0T1W0T1F0	S1M0T1W0T0F0					S0M1T1W0T1F1	S1M1T1W1T1F1	S0M1T1W1T1W1F1	S1M1T1W1T1F1
026	01			M1T1W1T1*F1	S1M1*T1W1T1FL
026	02			S*W*	M*F*	Th*	M*F*	W*	M*F*	M*	S*Th*	W*	W*	Th*	F*	F*	S*W*	TuL
026	03			M1T1W1*T1F1	S0M1*T1W1T1F1	S1*M1*T1W1*T1F1	S1*M1T0W0T1*F1	S1M1T1*W1T1F1	S1*M1T1W1T1*F1	S1M1*T1W0T1F1	S1M1T1W1T1*F1	S1M1T1W1*T1F1	S0M1T1*W1T1F1	S14M1*T1W0T1F1	S0M1*T0W0T0F0	S0M1THWHT1*F1	S1M1T1W1THF1	S0M0*T1WHT1F1*	S1M1T1W1T1F1*	S0M1*T1W1T1*F1	S1*M1T1W1*T1F1	S1M1T1*W1T1F1	S1M1T1W1TL
